# Supplementary material
Source: publisher site journal article supplement (https://www.dovepress.com/article/111116)
Supplement: Supplementary file 1 [file get_supplementary_file.php]

## Supplementary information

### Determination of minimum historical target SVR12 rate (PegIFN-ineligible patients)

Determining the minimum acceptable SVR rate for PegIFN-ineligible patients was challenging since there are no approved regimens for this population in which to benchmark. It was assumed that this population would be more difficult to treat than the typical PegIFN-eligible population due to more co-morbidities leading to more discontinuations and potential non-compliance. Although more co-morbidities may have led to increased AE reporting (eg exaggeration of an underlying baseline condition), non-compliance would have led to higher breakthrough rates. These issues could have negatively affected the SVR rates. Before enrolling patients in the trial, and without a cap of this PegIFN-ineligible population, the proportion of such patients within the overall study population of 1241.36 was unclear. Therefore, investigators were asked to flag whether a patient was deemed PegIFN-eligible or not at randomization, which was stratified for this important factor.

Table S1 presents the primary reasons patients fail treatment with a DAA-based regimen, including early discontinuations due to AEs, on-treatment virologic failure (OT VF) and relapse. A 71% SVR rate (benchmark for the PegIFN-eligible population without 5% reduction) was categorized by 10% rates of each type of failure (early discontinuation, OT VF, and relapse). These were roughly the different categories for failure observed in SOUND-C2. These patients were not expected to have greater relapse rates, so assumptions about increase rates in reasons for failure were restricted to early discontinuations and OT VF rates. A minor increase in one of these factors combined with a major increase in the occurrence of the other, or moderate increases in both, would result in SVR rates of 50% compared to the base case of 71%.

This rationale was based on many assumptions, but these patients had no alternative options for treatment, unlike PegIFN-eligible patients. Thus, any regimen that achieved 50% SVR was desirable and, prior to the recent approval of DAAS, such a response for GT1b-infected PegIFN-eligible patients had been the goal for many years.

**Table S1. Summary of assumptions and results utilized in the calculation of 50% for determination of minimum SVR rated within PegIFN-ineligible patients.**

|      |         |           | SVR | Comment                                                                               |
|------|---------|-----------|-----|---------------------------------------------------------------------------------------|
| DC % | OT VF % | Relapse % | %   |                                                                                       |
| 10   | 10      | 10        | 70  | Base case (~minimum SVR for TN)                                                       |
| 15   | 15      | 10        | 60  | Minor increase in DC rate; large increase in OT VF rate (eg due to compliance issues) |
| 15   | 20      | 10        | 55  |                                                                                       |
| 15   | 25      | 10        | 50  |                                                                                       |
| 20   | 15      | 10        | 55  | Moderate increases in both DC and OT VF rates                                         |
| 20   | 20      | 10        | 50  |                                                                                       |
| 20   | 25      | 10        | 45  |                                                                                       |
| 25   | 15      | 10        | 50  | Large increase in DC rate; minor increase in OT VF rate                               |
| 25   | 20      | 10        | 45  |                                                                                       |
| 25   | 25      | 10        | 40  |                                                                                       |

DC, discontinuation; OT VF, on-treatment virologic failure.

**Fig. S1. Study design for HCverso1 (A) and HCverso2 (B)**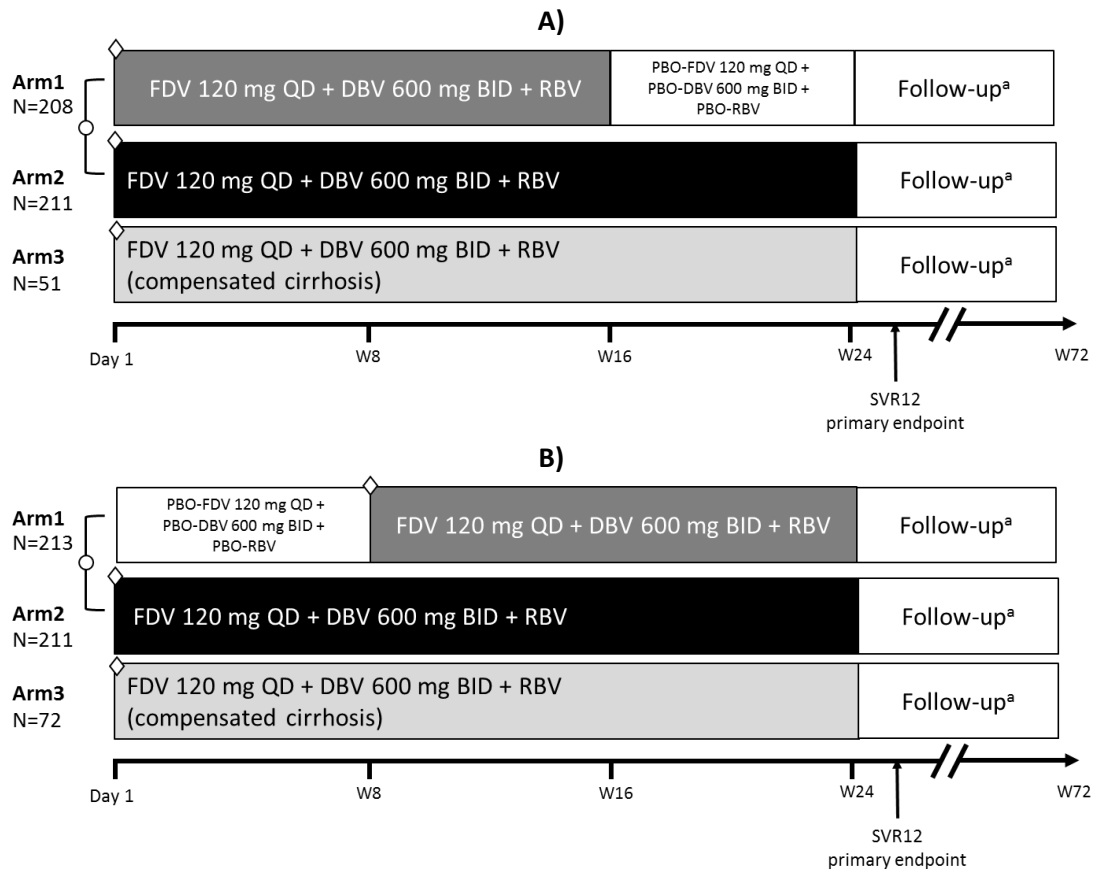**Fig. S2. Frequency of resistance-associated variants in patients not achieving SVR12 in HCverso1 (A) and HCverso2 (B)****A)**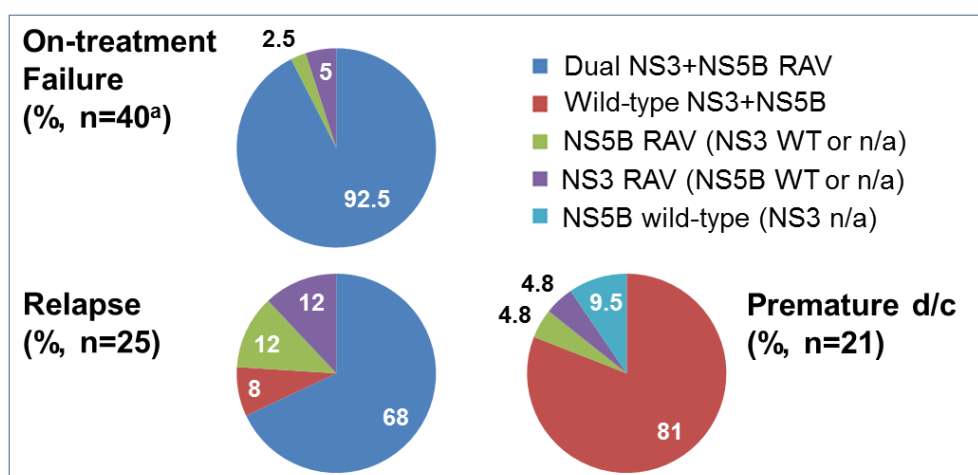

B)

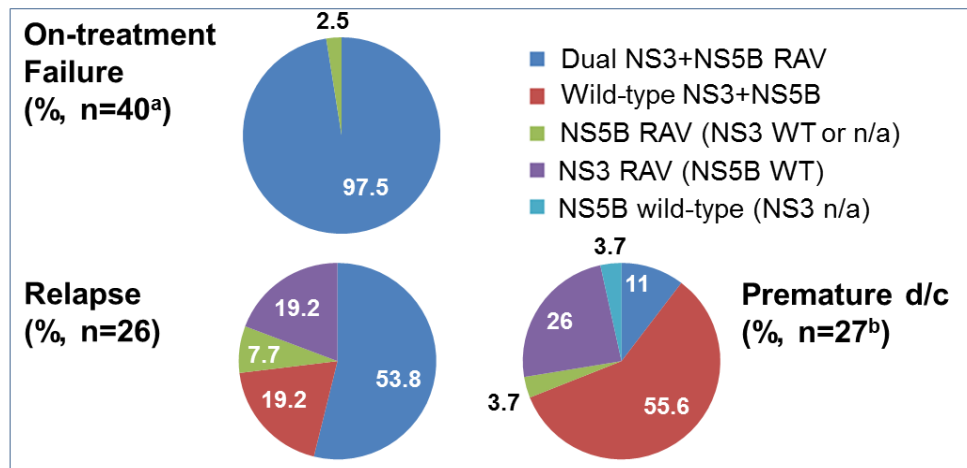

Only non-SVR12 patients with available GT-1b baseline and post-baseline sequence are described. Analysis of the NS3 region included R155, A156, and D168 RAVs, and the NS5B region included A421, P495, P496, and V499 RAVs. <sup>a</sup>In both studies, on-treatment failure includes patients with virologic breakthrough and 2 patients with lack of end of treatment response. <sup>b</sup>Includes premature discontinuations and excludes 2 patients who discontinued during placebo. d/c, discontinuation; n/a, sequence not available; RAV, resistance-associated variants; WT, wild-type.

**Figure S3. Total bilirubin (solid line) and ALT levels (dashed line) (mean  $\pm$  SD) over time in HCverso1 (A) and HCverso2 (B)**

A)

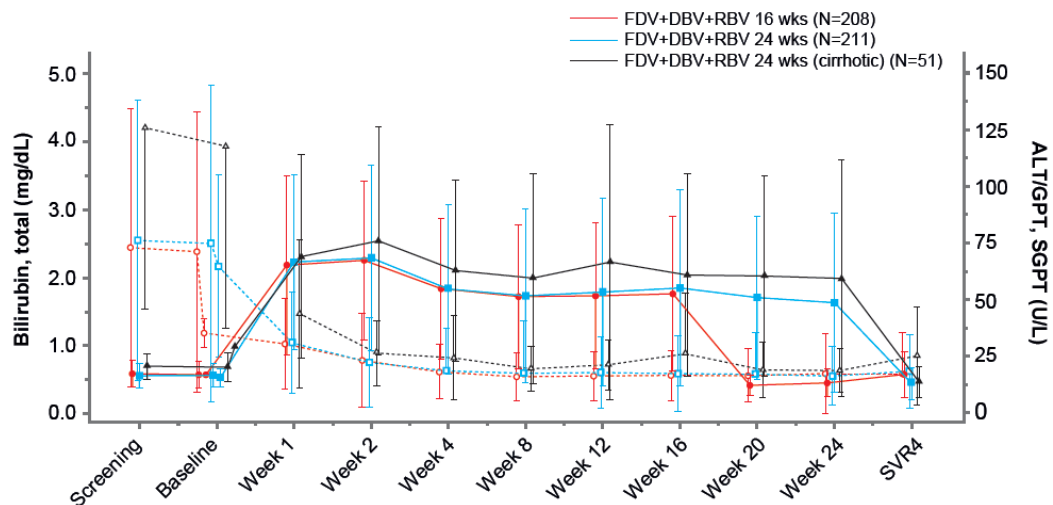

B)

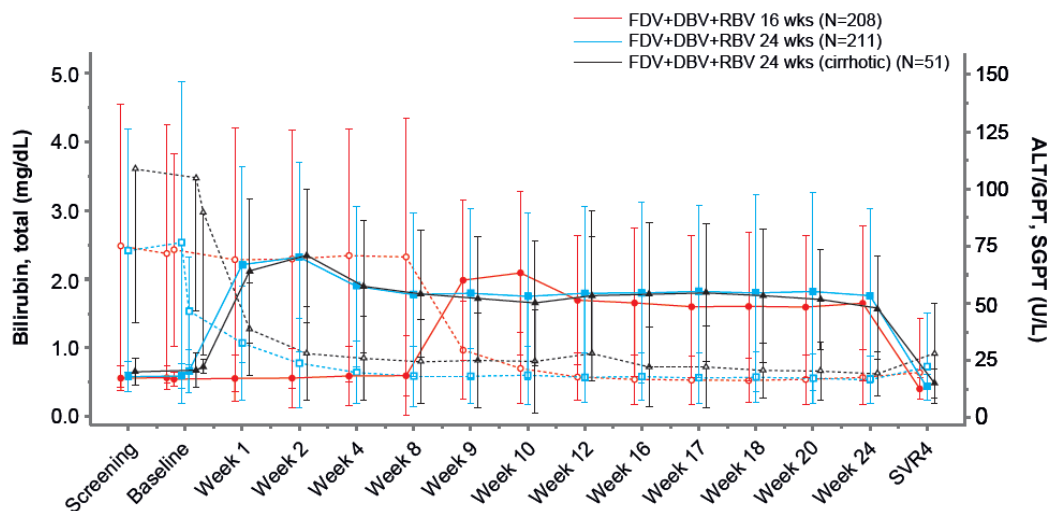

**Table S2. Exclusion criteria related to PegIFN/RBV eligibility**

|                                                                                                                                              | HCVerso1                                                | HCVerso2                                                |
|----------------------------------------------------------------------------------------------------------------------------------------------|---------------------------------------------------------|---------------------------------------------------------|
| Pre-existing psychiatric conditions                                                                                                          | Excluded                                                | Not excluded                                            |
| Abnormal thyroid function that cannot be controlled effectively by medication                                                                | Excluded                                                | Not excluded                                            |
| Active autoimmune-mediated disease                                                                                                           | Excluded                                                | Not excluded                                            |
| Requirement for chronic systemic corticosteroids                                                                                             | Excluded                                                | Not excluded                                            |
| History or other evidence of severe retinopathy or clinically significant ophthalmological disorder due to diabetes mellitus or hypertension | Excluded                                                | Not excluded                                            |
| Hemoglobin                                                                                                                                   | Exclude:<br><11.0 g/dL for women and <12.0 g/dL for men | Exclude:<br><11.0 g/dL for women and <12.0 g/dL for men |
| Absolute neutrophil count                                                                                                                    | Exclude:<br><1,500 cells/mm <sup>3</sup>                | Exclude:<br><1,000 cells/mm <sup>3</sup>                |
| Platelet count                                                                                                                               | Exclude:<br><90,000/mm <sup>3</sup>                     | Exclude:<br><70,000mm <sup>3</sup>                      |
| Creatinine clearance                                                                                                                         | Exclude:<br>≤50 mL/min                                  | Not excluded                                            |
| Diabetes mellitus                                                                                                                            | Exclude:<br>HbA1c >8.5%                                 | Not excluded                                            |
| Clinically evident red blood cell disorders                                                                                                  | Excluded                                                | Excluded                                                |

**Table S3. Association of baseline factors with SVR12 (multivariate logistic regression)**

| Study    | Baseline factor                                                   | P-value | Odds ratio (95% CI)                          |
|----------|-------------------------------------------------------------------|---------|----------------------------------------------|
| HCVerso1 | Treatment<br>24-week NC vs 16-week NC<br>24-week Cr vs 16-week NC | 0.0226  | 2.079 (1.230, 3.513)<br>1.195 (0.552, 2.586) |
|          | <i>IL28B</i> rs 12979860<br>CC vs non-CC                          | 0.0051  | 2.538 (1.322, 4.873)                         |
|          | Gender<br>Male vs female                                          | 0.0089  | 0.517 (0.315, 0.847)                         |
|          | Region<br>North America vs Europe                                 | 0.0029  | 0.435 (0.252, 0.753)                         |
| HCVerso2 | Treatment<br>24-week NC vs 16-week NC<br>24-week Cr vs 16-week NC | 0.0869  | 1.513 (0.894, 2.562)<br>0.716 (0.362, 1.416) |
|          | <i>IL28B</i> rs 12979860<br>CC vs non-CC                          | 0.0108  | 2.239 (1.205, 4.163)                         |
|          | Baseline HCV RNA<br>=800,000 vs <800,000                          | 0.0195  | 0.436 (0.217, 0.875)                         |
|          | Gender<br>Male vs female                                          | 0.0071  | 0.514 (0.316, 0.835)                         |

CI, confidence interval; Cr, cirrhotic; NC, non-cirrhotic.
